# Supplementary material for: pH-Responsive hyaluronic acid-enveloped ZIF-8 nanoparticles for anti-atherosclerosis therapy
Source: Royal Society of Chemistry journal article supplement (doi:10.1039/d2bm00603k), 2022-01-01
Supplement: d2bm00603k1.pdf [file d2bm00603k1.pdf]

## Supplementary Information

### **pH-responsive hyaluronic acid-enveloped ZIF-8 nanoparticles for anti-atherosclerosis therapy**

Essam Abdo Mohammed Saad Obaid<sup>a†</sup>, Shuai Wu<sup>a†</sup>, Yuan Zhong<sup>a</sup>, Meng Yan<sup>a</sup>, Li Zhu<sup>a</sup>, Bibo Li<sup>c</sup>, Yi Wang<sup>b\*</sup>, Wei Wu<sup>a\*</sup> and Guixue Wang<sup>a\*</sup>

<sup>a</sup>Key Laboratory for Biorheological Science and Technology of Ministry of Education, State and Local Joint Engineering Laboratory for Vascular Implants, Bioengineering College of Chongqing University, Chongqing, 400030, China

<sup>b</sup>College of Basic Medical Sciences, Chongqing Medical University, Chongqing 400016, China

<sup>c</sup>Department of Oncology, Chongqing People's Hospital, Chongqing 401147, China.

†These authors contributed equally to this work.

\*Corresponding authors: wanggx@cqu.edu.cn (Guixue Wang); david2015@cqu.edu.cn (Wei Wu); [wangyi@cqmu.edu.cn](mailto:wangyi@cqmu.edu.cn) (Yi Wang)

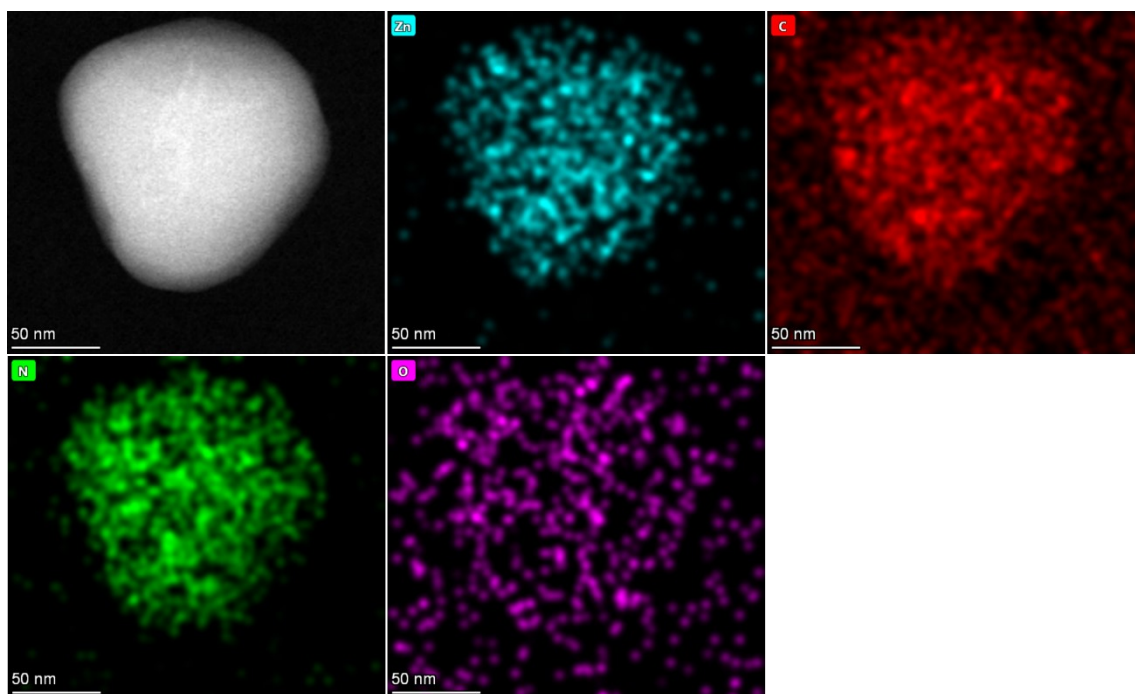

**Figure S1.** Dark-field EDX image of SIM/ZIF-8@HA NPs and corresponding EDX elemental (scale bar = 50 nm).

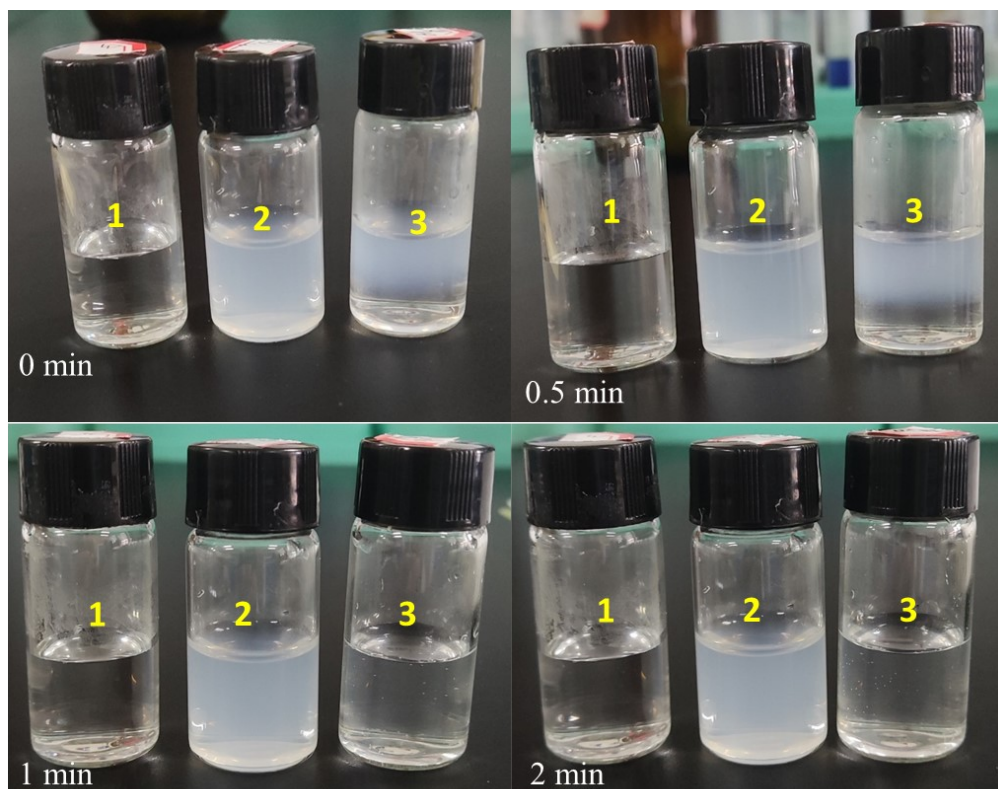

**Figure S2.** Degradation ability of SIM/ZIF-8@HA. Visual degradation study of SIM/ZIF-8@HA (1) Control (ultrapure water) (2) SIM/ZIF-8@HA and (3) SIM/ZIF-8@HA incubation in phosphate buffer saline (PBS) solution (pH 5) at different time points.

**Table S1.** Drug loading and encapsulation efficiency of SIM/ZIF-8 NPs ( $n = 7$ ).

| Sample    | Drug Loading Efficiency (%) | Drug Encapsulating Efficiency (%) |
|-----------|-----------------------------|-----------------------------------|
| SIM/ZIF-8 | 44.4                        | 77.65                             |

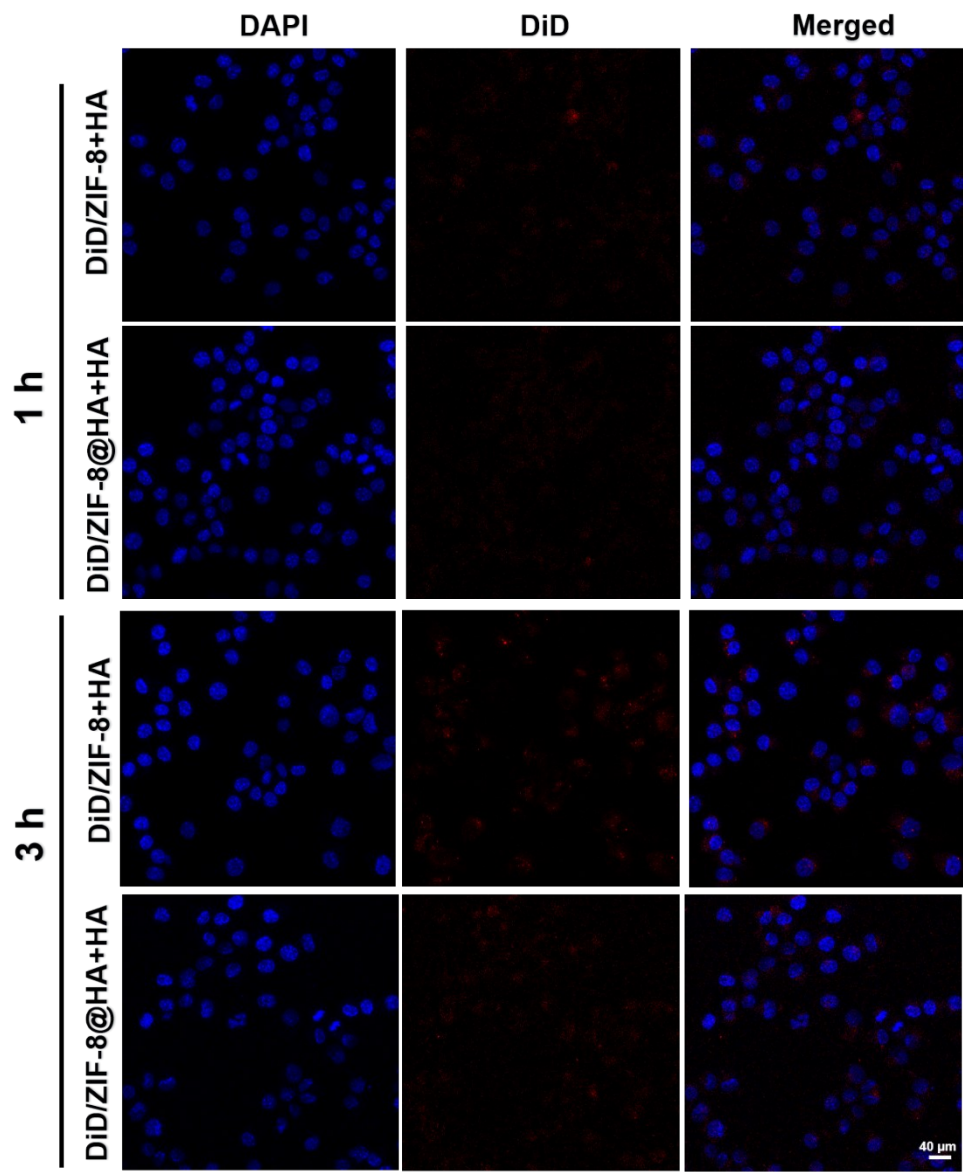

**Figure S3.** The fluorescent images of DiD/ZIF-8 and DiD/ZIF-8@HA co-incubated with HA pre-treated macrophages to compete CD44 binding, the cells were pre-treated with 5 mg/mL free HA for 3 h (scale bar= 40  $\mu$ m).

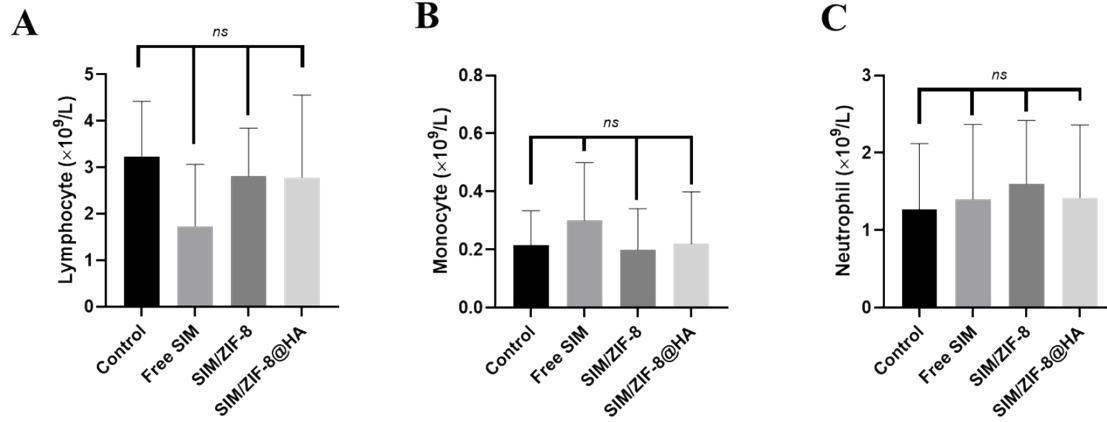

**Figure S4.** Blood cell counts of immune-associated cells including lymphocyte, monocyte and neutrophil after one month treatment ( $n=5$ , mean  $\pm$  SD). (*ns*, no significance).

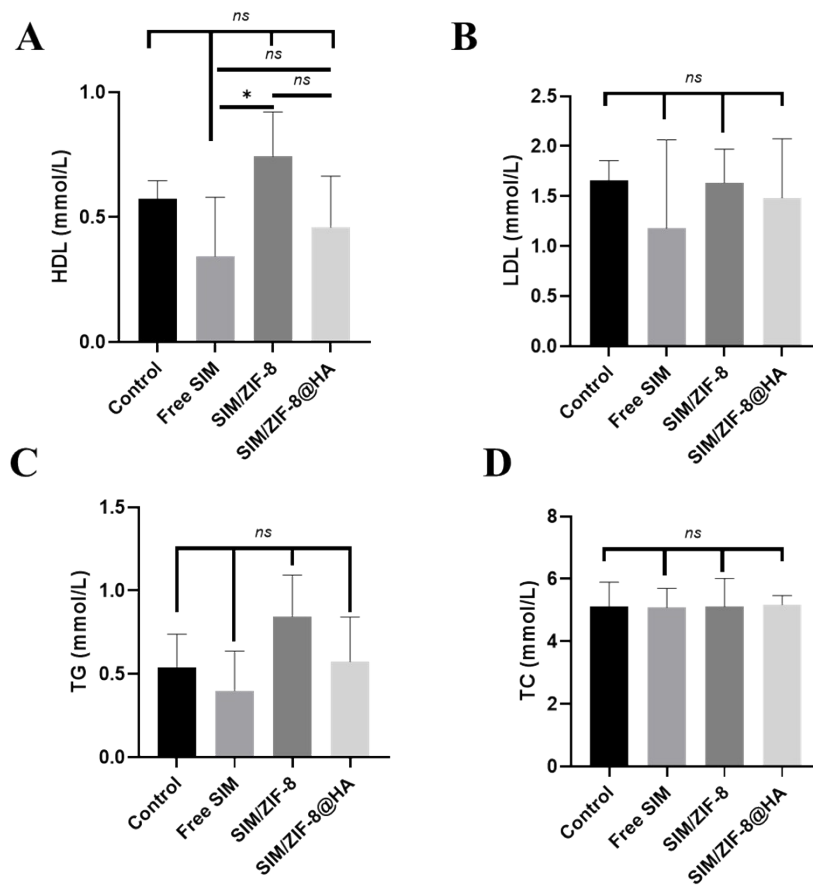

**Figure S5.** The blood lipid levels of high-density lipoprotein (HDL), low-density lipoprotein (LDL), triglyceride (TG), and total cholesterol (TC) ( $n=5$ , mean  $\pm$  SD). (\* $p < 0.05$ , and *ns*, no significance).
